# Supplementary material
Source: HighWire-hosted journal article supplement (https://bmjopen.bmj.com/content/9/10/e030505)
Supplement: inline-supplementary-material-1 [file inline-supplementary-material-1.pdf]

### Supplementary section - survey design

|           | Question                                                                                                                                 | Response options                                                                                                                                                                                                         |                                                                                                                                                                                                                                     | Question type                     |
|-----------|------------------------------------------------------------------------------------------------------------------------------------------|--------------------------------------------------------------------------------------------------------------------------------------------------------------------------------------------------------------------------|-------------------------------------------------------------------------------------------------------------------------------------------------------------------------------------------------------------------------------------|-----------------------------------|
| <b>1</b>  | Current deanery                                                                                                                          | <i>East of England</i><br><i>East Midland</i><br><i>Kent, Surrey &amp; Sussex</i><br><i>North East</i><br><i>NW Mersey</i><br><i>NW North Western</i><br><i>SW Peninsula</i><br><i>SW Severn</i><br><i>Thames Valley</i> | <i>Wessex</i><br><i>West Midlands</i><br><i>Yorkshire &amp; The Humber</i><br><i>London – NW Thames</i><br><i>London – NE and Central</i><br><i>London – S Thames</i><br><i>Scotland</i><br><i>Wales</i><br><i>Northern Ireland</i> | Multiple Choice – one answer only |
| <b>2</b>  | Year of training (if in OOPE select the year you are returning to)                                                                       | <i>ST3</i><br><i>ST4</i><br><i>ST5</i>                                                                                                                                                                                   | <i>ST6</i><br><i>ST7</i><br><i>Post-CCT</i>                                                                                                                                                                                         | Multiple Choice – one answer only |
| <b>3</b>  | Additional degree beyond medical degree                                                                                                  | <i>None</i><br><i>BSc</i>                                                                                                                                                                                                | <i>MSc</i><br><i>MD/PhD</i>                                                                                                                                                                                                         | Multiple Choice – one answer only |
| <b>4</b>  | Name                                                                                                                                     | <i>(free text)</i>                                                                                                                                                                                                       |                                                                                                                                                                                                                                     | Free text                         |
| <b>5a</b> | Do you feel confident that your local training programme adequately prepares you for future clinical practice utilising genomic medicine | <i>1. Very Poorly Prepared</i><br><i>2. Poorly Prepared</i><br><i>3. Neither Well nor Poorly Prepared</i><br><i>4. Well Prepared</i><br><i>5. Very Well Prepared</i>                                                     |                                                                                                                                                                                                                                     | Matrix / rating scale             |

|           |                                                                                                                                                                                                                                                                                                                                                                                                                                                                        |                                                                                                                                                                      |                                   |
|-----------|------------------------------------------------------------------------------------------------------------------------------------------------------------------------------------------------------------------------------------------------------------------------------------------------------------------------------------------------------------------------------------------------------------------------------------------------------------------------|----------------------------------------------------------------------------------------------------------------------------------------------------------------------|-----------------------------------|
| <b>5b</b> | Do you feel confident that your local training programme adequately prepares you for future clinical practice utilising personalised or precision medicine                                                                                                                                                                                                                                                                                                             | <i>1. Very Poorly Prepared</i><br><i>2. Poorly Prepared</i><br><i>3. Neither Well nor Poorly Prepared</i><br><i>4. Well Prepared</i><br><i>5. Very Well Prepared</i> | Matrix / rating scale             |
| <b>6a</b> | Do you know what the mainstreaming of genomics means for your future clinical practice?                                                                                                                                                                                                                                                                                                                                                                                | Yes<br>No                                                                                                                                                            | Multiple Choice – one answer only |
| <b>6b</b> | If yes, what does mainstreaming of genomics mean to you?                                                                                                                                                                                                                                                                                                                                                                                                               | <i>(free text)</i>                                                                                                                                                   | Free text                         |
| <b>7</b>  | Have you recruited patients to the 100,000 genomes project?                                                                                                                                                                                                                                                                                                                                                                                                            | Yes<br>No                                                                                                                                                            | Multiple Choice – one answer only |
| <b>8</b>  | Do you feel enabled to perform genetic testing for the following conditions? <ul style="list-style-type: none"> <li>• Lynch syndrome testing</li> <li>• Genetic screening for polyposis syndromes</li> <li>• KRAS testing in colorectal cancer</li> <li>• TPMT status prior to thiopurine use</li> <li>• HFE genotyping for suspected haemochromatosis</li> <li>• HLA subtyping in coeliac disease</li> <li>• Genetic screening for hereditary pancreatitis</li> </ul> | Yes<br>No                                                                                                                                                            | Multiple Choice – one answer only |
| <b>9</b>  | A 32-year-old lady has been referred to outpatients. Her 35-year-old brother has been diagnosed with                                                                                                                                                                                                                                                                                                                                                                   | <u>For each statement:</u>                                                                                                                                           | Matrix / rating scale             |

|    |                                                                                                                                                                                                                                                                                                                                                                                                                                                                                                                                                                                                             |                                                                                                                                                                                           |                       |
|----|-------------------------------------------------------------------------------------------------------------------------------------------------------------------------------------------------------------------------------------------------------------------------------------------------------------------------------------------------------------------------------------------------------------------------------------------------------------------------------------------------------------------------------------------------------------------------------------------------------------|-------------------------------------------------------------------------------------------------------------------------------------------------------------------------------------------|-----------------------|
|    | <p>bowel cancer and she is concerned about her own cancer risk. How strongly do you agree with the following statements?</p> <ul style="list-style-type: none"> <li>• I feel comfortable adhering to national guidance on colorectal cancer screening in this patient</li> <li>• I feel clinically prepared to counsel this patient on cancer risk</li> <li>• I am comfortable obtaining informed consent for genetic testing</li> <li>• I am aware of local pathways for the genetic testing of this patient</li> </ul>                                                                                    | <p>1. <i>Strongly Disagree</i><br/> 2. <i>Disagree</i><br/> 3. <i>Neither Agree nor Disagree</i><br/> 4. <i>Agree</i><br/> 5. <i>Strongly Agree</i></p>                                   |                       |
| 10 | <p>How strongly do you agree with the following statements?</p> <ul style="list-style-type: none"> <li>• More education is needed before widespread genomic testing can be implemented</li> <li>• Genetically-determined conditions are too rare to justify mainstream use of genomic testing in all secondary care settings</li> <li>• There is not enough clinical guidance for interventions based on the results of genomic testing</li> <li>• Genomic testing will be overused or misused by healthcare professionals</li> <li>• Genomic testing results will be misinterpreted by patients</li> </ul> | <p><u>For each statement:</u></p> <p>1. <i>Strongly Disagree</i><br/> 2. <i>Disagree</i><br/> 3. <i>Neither Agree nor Disagree</i><br/> 4. <i>Agree</i><br/> 5. <i>Strongly Agree</i></p> | Matrix / rating scale |

|           |                                                                                                                                                                                                                                                                                                                                                                                                                                                                                                                                                                                                                    |                                                               |                       |
|-----------|--------------------------------------------------------------------------------------------------------------------------------------------------------------------------------------------------------------------------------------------------------------------------------------------------------------------------------------------------------------------------------------------------------------------------------------------------------------------------------------------------------------------------------------------------------------------------------------------------------------------|---------------------------------------------------------------|-----------------------|
|           | <ul style="list-style-type: none"> <li>• There is insufficient legal protection from discrimination (e.g. insurance) for individuals with genetic susceptibilities to disease</li> <li>• Genomic testing is not cost-effective</li> </ul>                                                                                                                                                                                                                                                                                                                                                                          |                                                               |                       |
| <b>11</b> | <p>Which of these changes do you think would be useful to help prepare you in utilising genomics in your future clinical practice?</p> <ul style="list-style-type: none"> <li>• Dedicated training days focusing on genomics</li> <li>• Updated gastroenterology JRCPTB curriculum and SCE examination</li> <li>• Better defined pathways for referral into local genomic services</li> <li>• Novel opportunities for subspecialty training in genomic medicine</li> <li>• Training in 'mainstreaming' genetic testing i.e. performing gene testing in your own clinics rather than referring elsewhere</li> </ul> | <p><u>For each statement:</u></p> <p>Yes<br/>Maybe<br/>No</p> | Matrix / rating scale |
| <b>12</b> | Any other comments                                                                                                                                                                                                                                                                                                                                                                                                                                                                                                                                                                                                 | (free text)                                                   | Free text             |
